# Supplementary material for: Nanoporous aramid nanofibre separators for nonaqueous redox flow batteries
Source: PubMed Central journal article supplement (PMC6180111; doi:10.1038/s41467-018-05752-x), 2018-10-10
Supplement: 41467_2018_5752_MOESM1_ESM.pdf [file 41467_2018_5752_MOESM1_ESM.pdf]

Nanoporous Aramid Nanofiber Separators for  
Non-Aqueous Redox Flow Batteries

Tung et al.

Supplementary Information

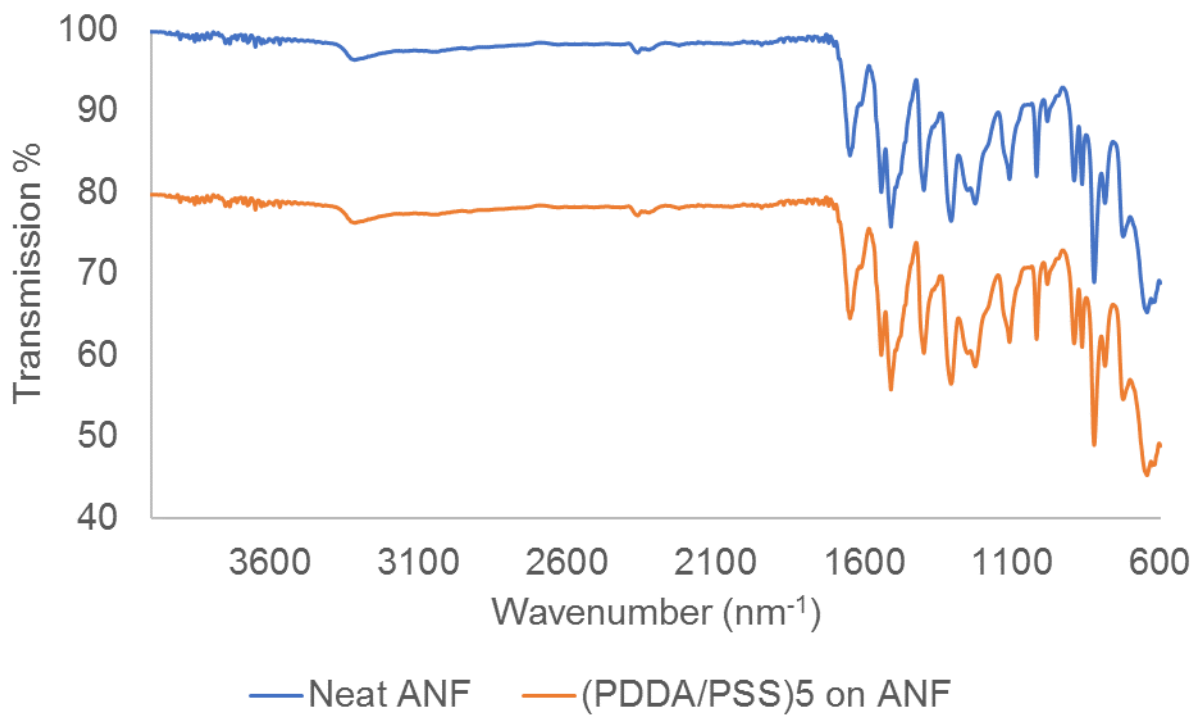

Supplementary Figure 1 FTIR spectra of neat ANF and (PDDA/PSS)<sub>5</sub> on ANF

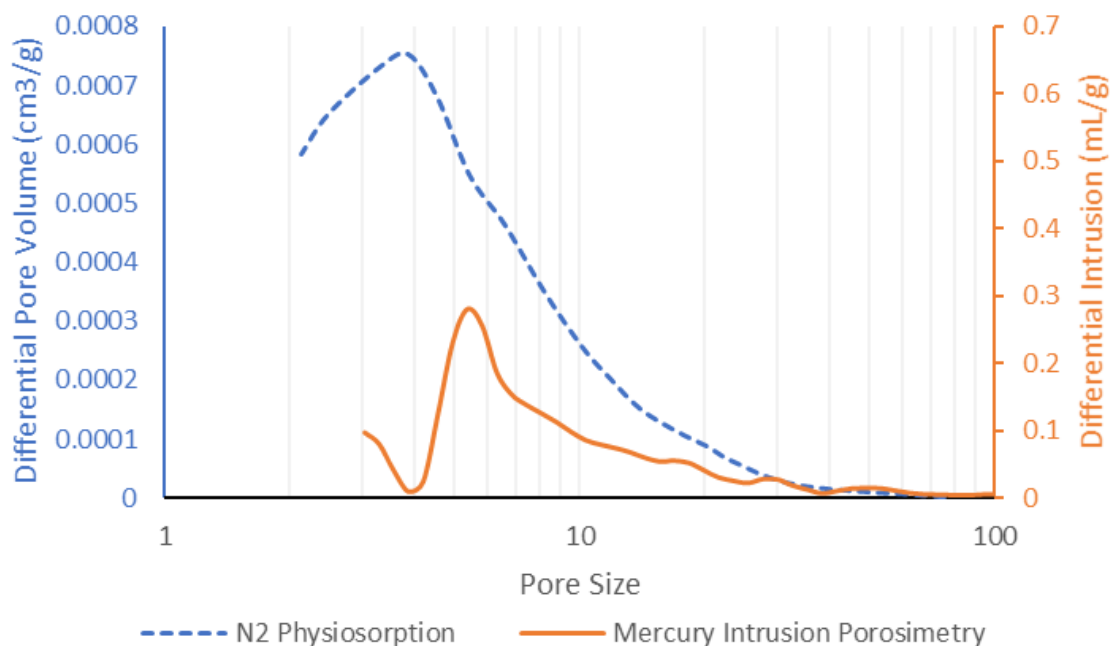

Supplementary Figure 2 Pore size distribution of ANF separator determined using (a) N<sub>2</sub> Physiosorption and (b) mercury intrusion porosimetry

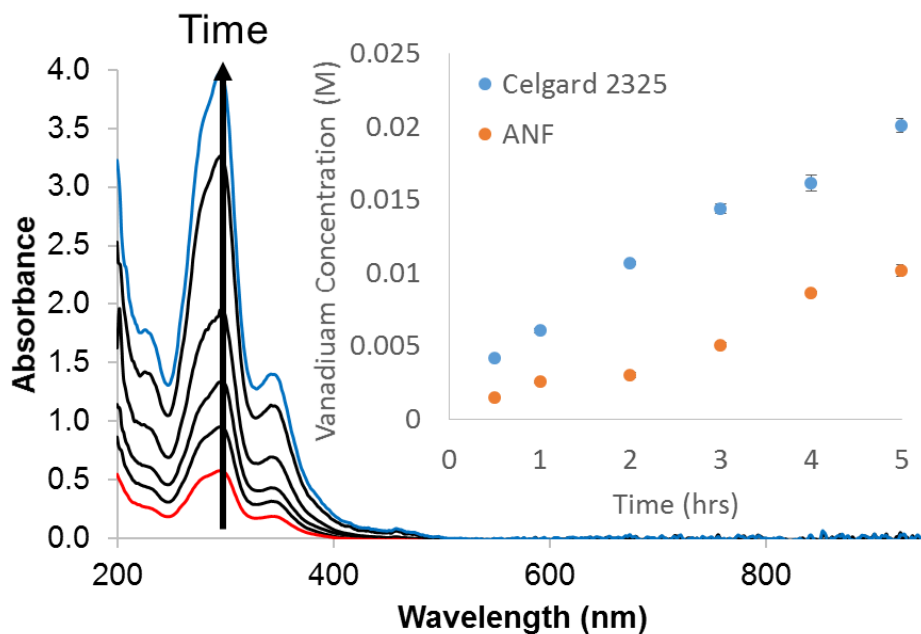

Supplementary Figure 3 UV-Vis spectra of V(acac)<sub>3</sub> crossover in Celgard 2325 H-Type cell; Insert: Concentration over time curve of Celgard 2325 and ANF. Neosepta and (PDDA/ANF)<sub>5</sub> on ANF did not show any crossover after 5 hours. Error bars are calculated using the standard deviation of 5 measurements.

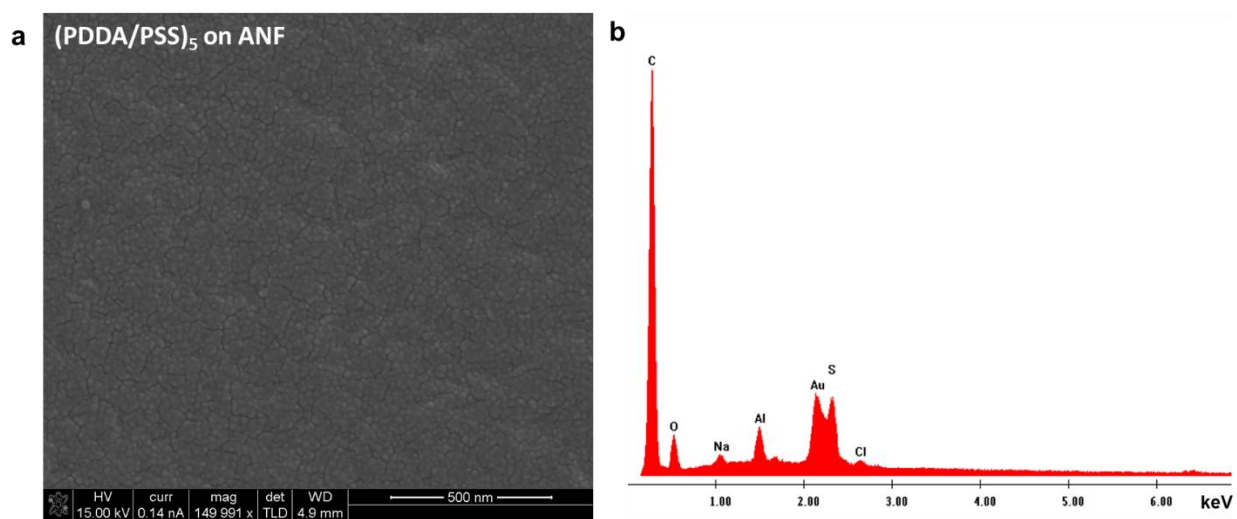

Supplementary Figure 4 (a) Scanning electron micrograph of the surface of (PDDA/PSS)<sub>5</sub> on ANF; (b) Energy dispersive spectra (EDAX) of area depicted in (a) showing Na, Cl and S signals confirming the deposition of PDDA and PSS.

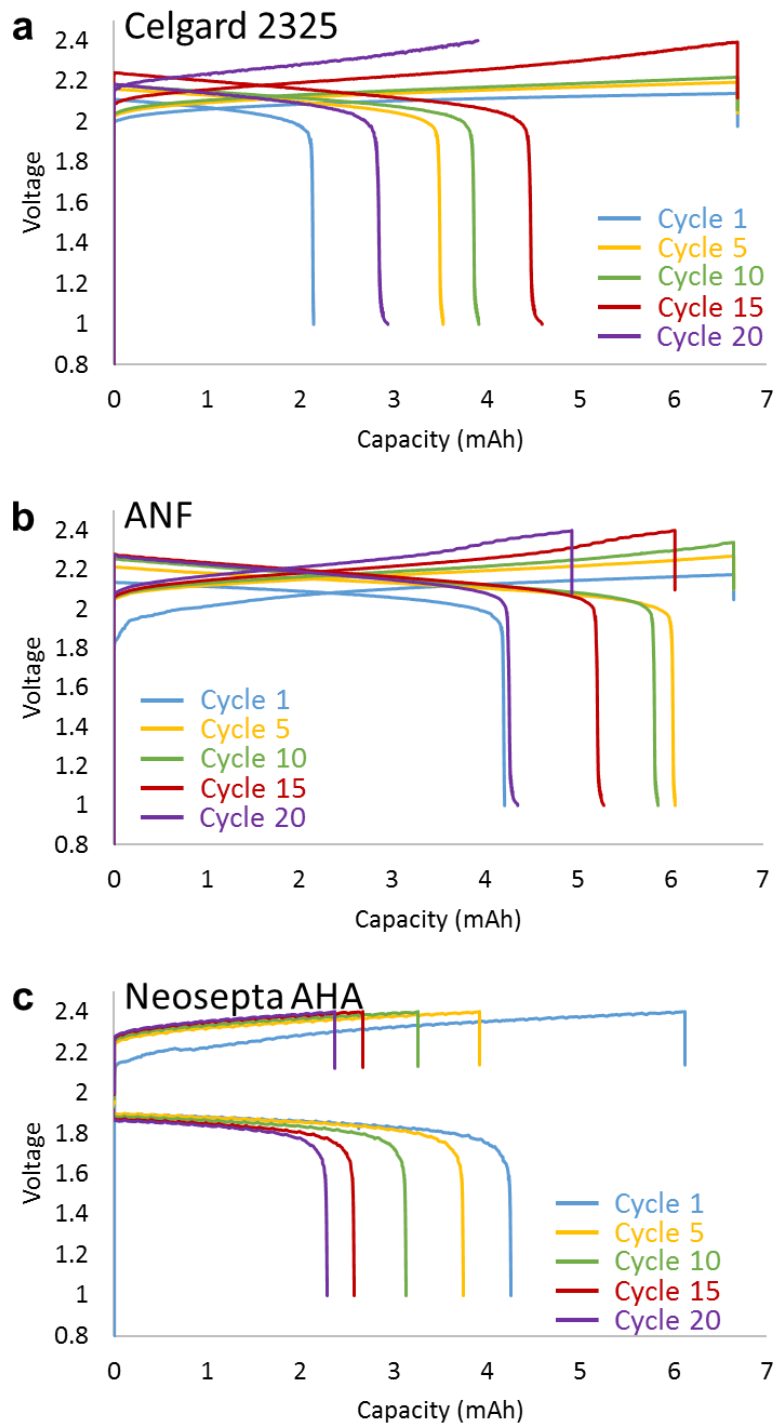

Supplementary Figure 5 Voltage profile of flow cells with (a) Celgard 2325, (b) ANF, and (c) Neosepta AHA as RFB separator.

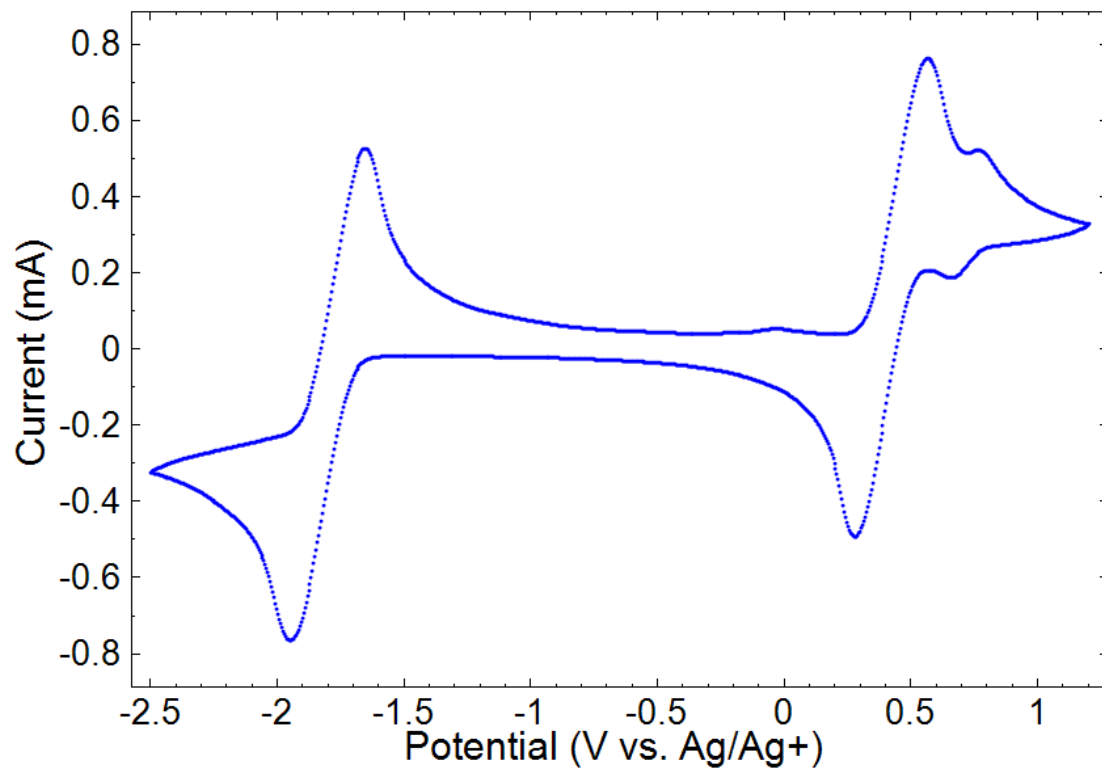

Supplementary Figure 6 Cyclic voltammogram of 10mM  $V(acac)_3$ , 500mM  $TBABF_4$  in acetonitrile; scan rate 100mV/s; 5th cycle shown.

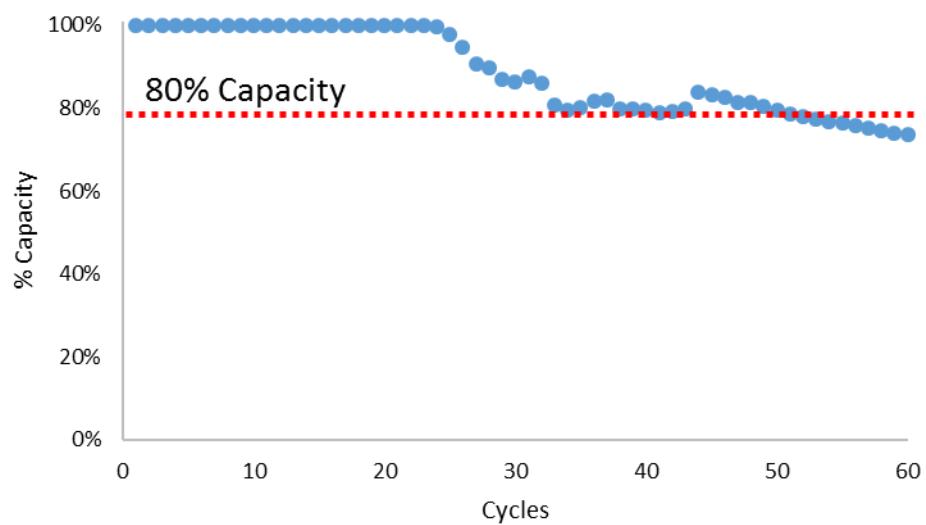

Supplementary Figure 7 % Capacity vs. Cycle for (PDDA/PSS)<sub>5</sub> on ANF flow cell. 0.05M V(acac)<sub>3</sub> 0.5M TEABF<sub>4</sub> in ACN.

Supplementary Table 1 Summary comparing CE and VE of Flow Cells with various membranes

| Separator/Membrane                                                             | Permeability<br>( $\times 10^{-7} \text{ cm}^2 \text{ s}^{-1}$ ) | Electrolyte<br>Condition                                                                                                                                      | Current<br>Density<br>( $\text{mA}/\text{cm}^2$ ) | Cycle<br>Time<br>(hrs) | Coulombic<br>Efficiency<br>(CE) | Voltaic<br>Efficiency<br>(VE) | CIE/Time<br>( $\text{s}^{-1}$ ) | Reference |
|--------------------------------------------------------------------------------|------------------------------------------------------------------|---------------------------------------------------------------------------------------------------------------------------------------------------------------|---------------------------------------------------|------------------------|---------------------------------|-------------------------------|---------------------------------|-----------|
| Celgard 2325                                                                   | 7.22                                                             | 0.05M V(acac) <sub>3</sub> /0.5M TEABF <sub>4</sub><br>in MeCN                                                                                                | 1                                                 | ~3.6                   | 55%#                            | 83%#                          | 0.13                            | This work |
| Neosepta AHA                                                                   | 0.03                                                             | 0.05M V(acac) <sub>3</sub> /0.5M TEABF <sub>4</sub><br>in MeCN                                                                                                | 1                                                 | ~3.9                   | 70%#                            | 76%#                          | 0.077                           | This work |
| ANF                                                                            | 0.82                                                             | 0.05M V(acac) <sub>3</sub> /0.5M TEABF <sub>4</sub><br>in MeCN                                                                                                | 1                                                 | ~4.5                   | 88%#                            | 87%#                          | 0.027                           | This work |
| (PDDA/PSS) <sub>5</sub> on ANF                                                 | 0.003                                                            | 0.05M V(acac) <sub>3</sub> /0.5M TEABF <sub>4</sub><br>in MeCN                                                                                                | 1                                                 | ~4.9                   | 95%#                            | 82%#                          | 0.010                           | This work |
| TEA <sup>+</sup> -Nafion                                                       | -                                                                | 0.1M V(acac) <sub>3</sub> /0.5M TEABF <sub>4</sub><br>in MeCN                                                                                                 | 10                                                | ~1.3*                  | 91%                             | 88%                           | 0.069*                          | [1]       |
| Daramic 175 SLI Microporous Separator                                          | -                                                                | 0.1M V(acac) <sub>3</sub> /0.5M TEABF <sub>4</sub><br>in MeCN                                                                                                 | 10                                                | ~1.2*                  | 74%                             | 92%                           | 0.22*                           | [1]       |
| Neosepta AHA                                                                   | -                                                                | 0.1M V(acac) <sub>3</sub> /0.5M TEABF <sub>4</sub><br>in MeCN                                                                                                 | 1                                                 | ~10*                   | 51%                             | 51%                           | 0.049*                          | [1]       |
| Poly(styrene-vinylbenzene chloride-divinyl<br>benzene)<br>Pore-filled Membrane | 0.045                                                            | 0.4M Fe(bpy) <sub>3</sub> (BF <sub>4</sub> ) <sub>2</sub> /0.2M<br>Ni(bpy) <sub>3</sub> (BF <sub>4</sub> ) <sub>2</sub><br>with 0.5M TEABF <sub>4</sub> in PC | -                                                 | ~3.5*                  | 95%                             | 92%*                          | 0.014*                          | [2]       |
| Poly(4-vinylpyridine)-1,4-dibromobutane<br>Anion Exchange Membrane             | 1.91                                                             | 0.01M V(acac) <sub>3</sub> /0.1M TEABF <sub>4</sub><br>in MeCN                                                                                                | 0.1                                               | ~3.8*                  | 92%                             | 96%                           | 0.021*                          | [3]       |
| PDDA/urushi Semi-interpenetrating Network<br>Layer<br>coated on Celgard 2400   | 4.53                                                             | 0.01M V(acac) <sub>3</sub> /0.1M TEABF <sub>4</sub><br>in MeCN                                                                                                | 0.5                                               | ~2.4*                  | 70%                             | 61%*                          | 0.13*                           | [4]       |

#Averaged over cycles before 80% initial capacity

\*Estimated from reported experimental conditions &amp; data

- Value was not given in article



## Supplementary References

1. Escalante-Garcia, I. L., Wainright, J. S., Thompson, L. T. & Savinell, R. F. Performance of a Non-Aqueous Vanadium Acetylacetonate Prototype Redox Flow Battery: Examination of Separators and Capacity Decay. *Journal of the Electrochemical Society* 162, A363–A372 (2014).
2. Kim, D. H. *et al.* Pore-filled anion-exchange membranes for non-aqueous redox flow batteries with dual-metal-complex redox shuttles. *Journal of Membrane Science* 454, 44–50 (2014).
3. Maurya, S., Shin, S. H., Sung, K. W. & Moon, S. H. Anion exchange membrane prepared from simultaneous polymerization and quaternization of 4-vinyl pyridine for non-aqueous vanadium redox flow battery applications. *Journal of Power Sources* 255, 325–334 (2014).
4. Cho, E. & Won, J. Novel composite membrane coated with a poly(diallyldimethylammonium chloride)/urushi semi-interpenetrating polymer network for non-aqueous redox flow battery application. *Journal of Power Sources* 335, 12–19 (2016).
